# Supplementary material for: Single-Cell Analysis of the Plasmablast Response to Vibrio cholerae Demonstrates Expansion of Cross-Reactive Memory B Cells
Source: PubMed Central journal article supplement (PMC5181778; doi:10.1128/mbio.02021-16), 2016-12-20
Supplement: mbo006163110sf2.pdf [file mbo006163110sf2.pdf]

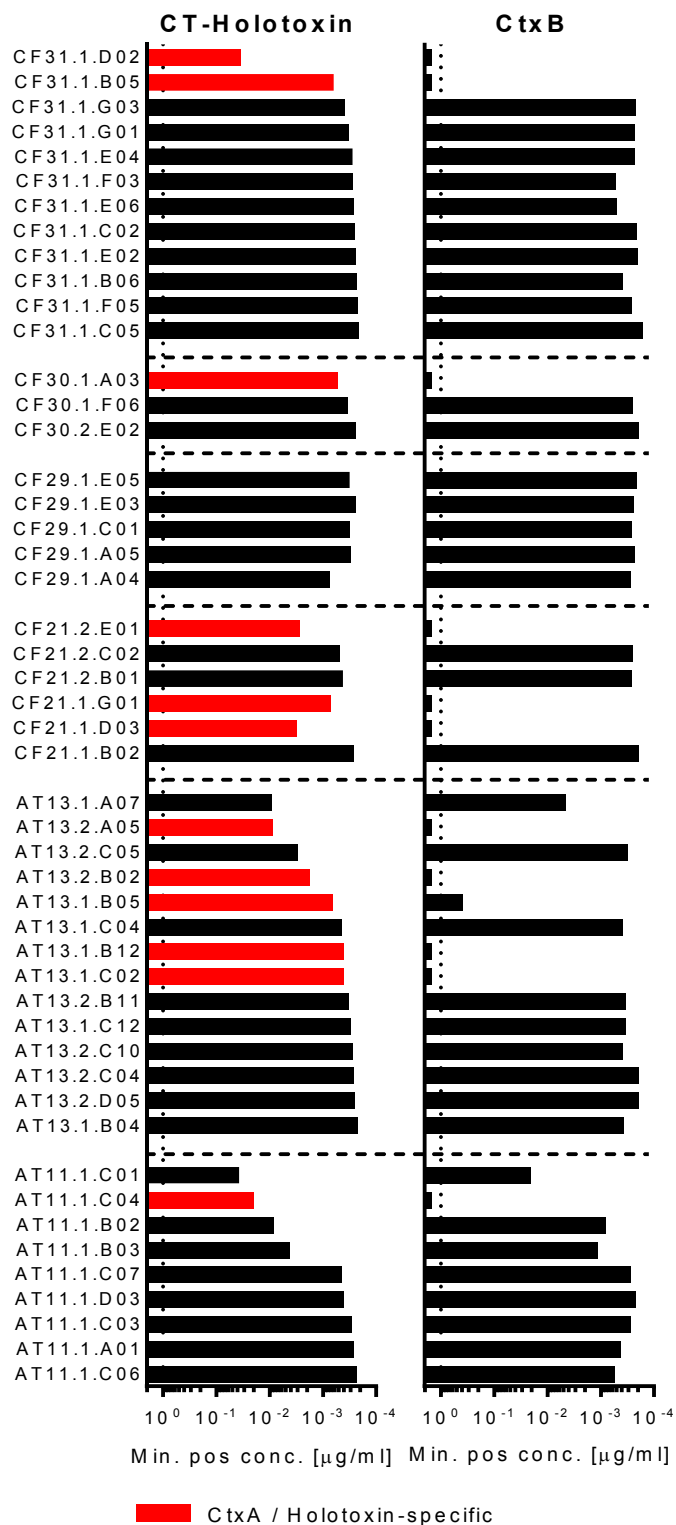

**Figure S2. Cholera toxin-specific antibodies.** Antibody affinity to cholera holotoxin and CtxB. Antibodies denoted by red bars bound to CT holotoxin but not the CtxB subunit at a concentration of 1  $\mu\text{g/ml}$  (dotted line). Each antibody was measured in at least two independent experiments.
