# Supplementary material for: Single-Cell Analysis of the Plasmablast Response to Vibrio cholerae Demonstrates Expansion of Cross-Reactive Memory B Cells
Source: PubMed Central journal article supplement (PMC5181778; doi:10.1128/mbio.02021-16), 2016-12-20
Supplement: mbo006163110sf3.pdf [file mbo006163110sf3.pdf]

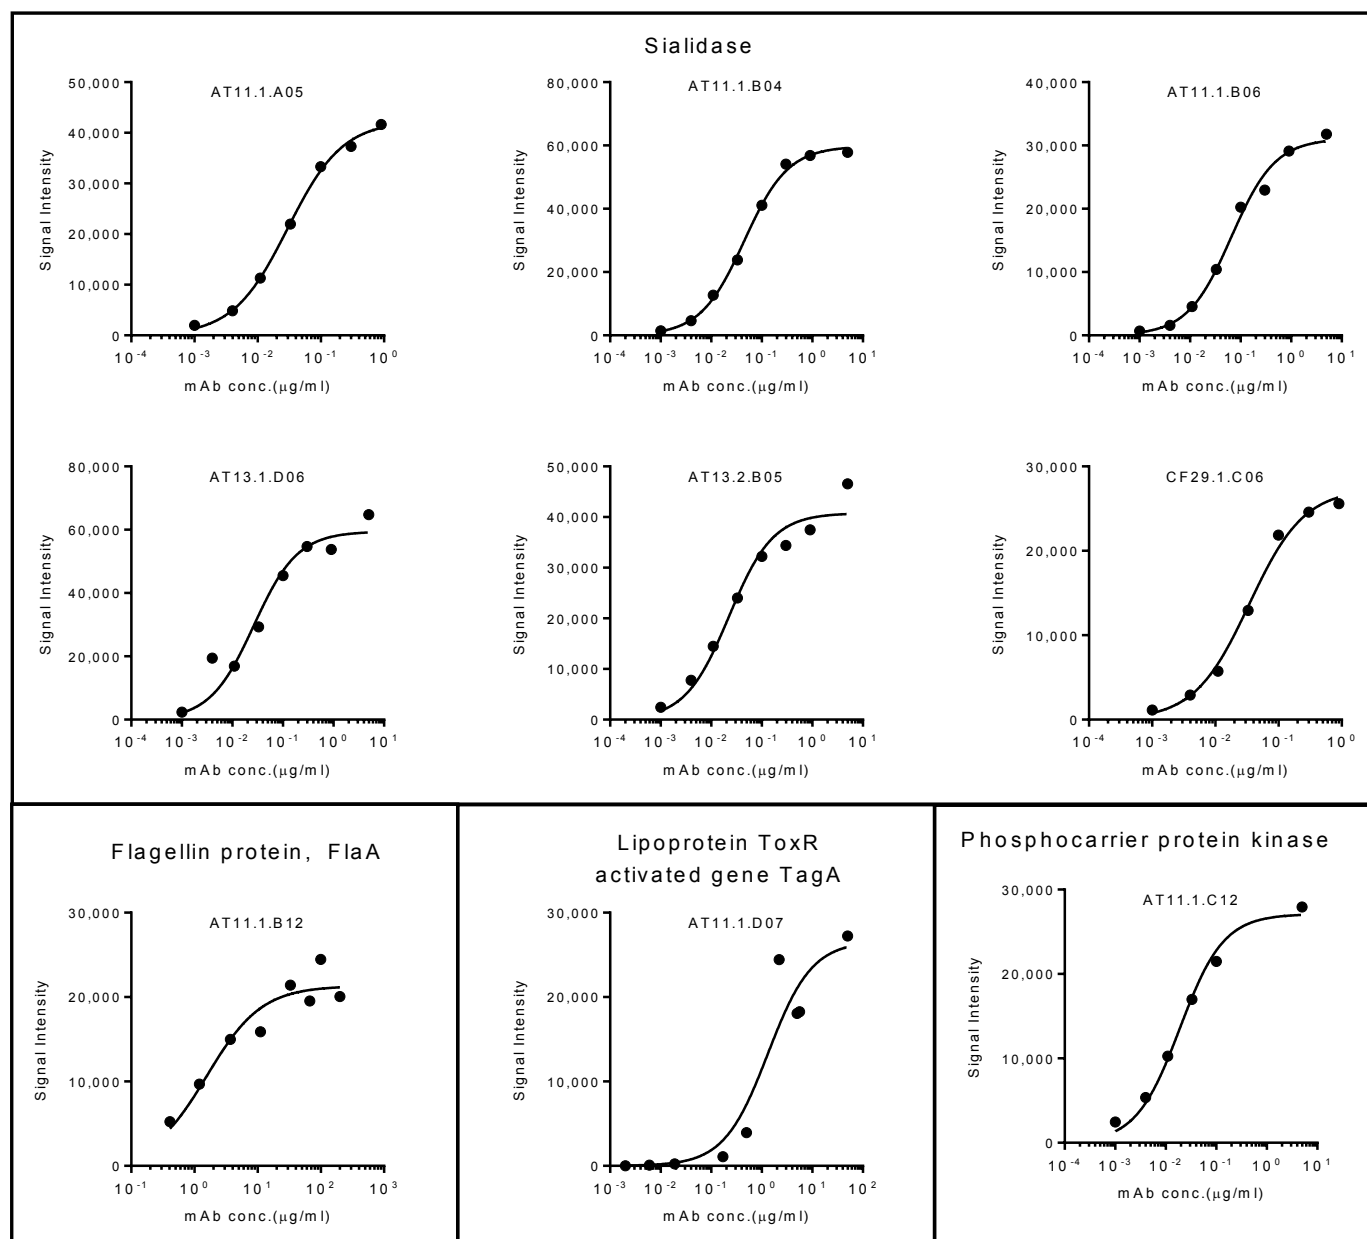

**Figure S3. *V. cholerae*-specific mAbs show a dose dependent binding to four antigens using protein microarray.** Binding curves of sialidase, FlaA-, TagA-, and phosphocarrier protein kinase-specific mAbs were generated using the targeted array. Different concentrations of antibody ranging from 100 to 0.001  $\mu\text{g}/\text{ml}$  were titrated on microarray chips. For all antibodies, the signal intensity was antibody concentration dependent.
