# Supplementary material for: Single-Cell Analysis of the Plasmablast Response to Vibrio cholerae Demonstrates Expansion of Cross-Reactive Memory B Cells
Source: PubMed Central journal article supplement (PMC5181778; doi:10.1128/mbio.02021-16), 2016-12-20
Supplement: mbo006163110sf5.pdf [file mbo006163110sf5.pdf]

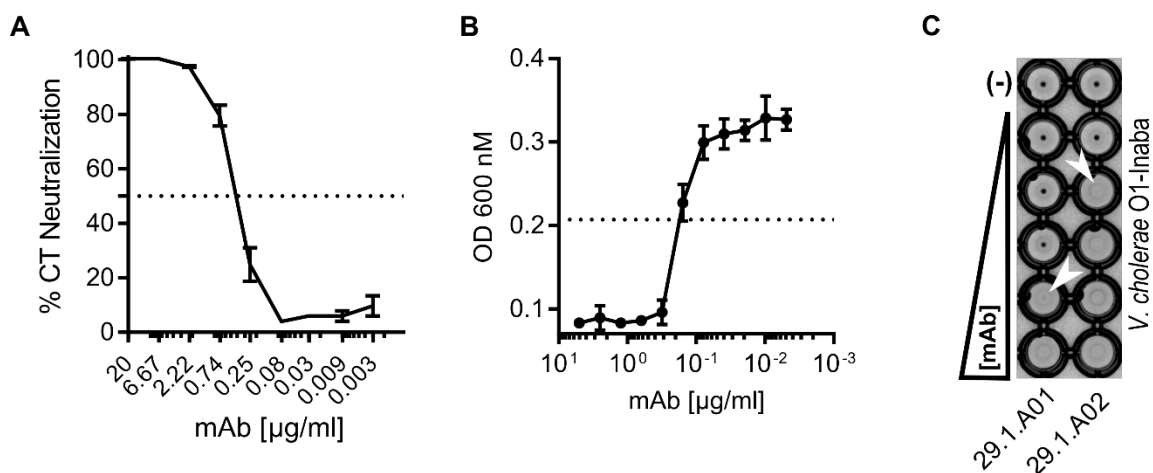

**Figure S5. Representative functional assay data. (A)** Analysis of antibody-mediated toxin neutralization (mAb: CF29.1.E03). Values show the mean percent reduction in intracellular cAMP levels relative to a no-antibody treatment control. Bars represent the standard deviation of two technical replicates. The dotted line indicates the 50% reduction in CT-induced cAMP levels relative to a no-antibody control. This threshold was used to calculate toxin neutralization  $EC_{50}$  values for each mAb; bars show SEM of the assay measured in duplicate. **(B)** Antibody-mediated vibriocidal activity is shown to *V. cholerae* O1-Ogawa for mAb AT11.1.A04. Bars show SEM of the assay measured in triplicate. Higher values on the y-axis correspond to increased culture turbidity as measured by UV absorbance at 600 nM.  $EC_{50}$  values were determined as the concentration of mAb that effected a 50% reduction in bacterial growth (dotted line). **(C)** Antibody-mediated bacterial agglutination with 2 fold titrated is mAb shown. White arrows depict the well displaying the minimal agglutination concentration.
