# Supplementary material for: Single-Cell Analysis of the Plasmablast Response to Vibrio cholerae Demonstrates Expansion of Cross-Reactive Memory B Cells
Source: PubMed Central journal article supplement (PMC5181778; doi:10.1128/mbio.02021-16), 2016-12-20
Supplement: mbo006163110st1.pdf [file mbo006163110st1.pdf]

**Table SI.** Cholera patient cohort data

| <b>Patient ID</b> | <b>Age</b> | <b>Gender</b> | <b><i>V. cholerae</i> serogroup-type</b> | <b>Blood Group</b> | <b>% PB d7<sup>†</sup></b> | <b>Single-cell PB sort</b> | <b>Vibriocidal titer, d2*</b> | <b>Vibriocidal titer, d7*</b> |
|-------------------|------------|---------------|------------------------------------------|--------------------|----------------------------|----------------------------|-------------------------------|-------------------------------|
| <b>AT11</b>       | 18         | M             | O1-Ogawa                                 | O                  | 10                         | Yes                        | 5                             | 640                           |
| <b>AT13</b>       | 43         | F             | O1-Ogawa                                 | AB                 | 2                          | Yes                        | 40                            | 2,560                         |
| <b>CF21</b>       | 20         | M             | O1-Ogawa                                 | B                  | 14                         | Yes                        | 10                            | 1,280                         |
| <b>CF22</b>       | 23         | F             | O1-Ogawa                                 | A                  | 1                          | -                          | -                             | -                             |
| <b>CF23</b>       | 28         | M             | O1-Ogawa                                 | B                  | 3                          | -                          | -                             | -                             |
| <b>CF24</b>       | 45         | F             | O1-Ogawa                                 | O                  | 3                          | -                          | -                             | -                             |
| <b>CF25</b>       | 35         | F             | O1-Ogawa                                 | O                  | 11                         | -                          | -                             | -                             |
| <b>CF27</b>       | 25         | F             | O1-Ogawa                                 | O                  | 9                          | -                          | -                             | -                             |
| <b>CF29</b>       | 30         | M             | O1-Ogawa                                 | O                  | 24                         | Yes                        | 5                             | 1,280                         |
| <b>CF30</b>       | 29         | F             | O1-Ogawa                                 | O                  | 29                         | Yes                        | 5                             | 320                           |
| <b>CF31</b>       | 18         | F             | O1-Ogawa                                 | A                  | 7                          | Yes                        | 80                            | 5,120                         |

<sup>†</sup> Defined here as % CD38/CD27 hi cells of total CD19<sup>+</sup> cells

\*Serum vibriocidal titers measured for *V. cholerae* O1-Ogawa
