# Supplementary material for: Single-Cell Analysis of the Plasmablast Response to Vibrio cholerae Demonstrates Expansion of Cross-Reactive Memory B Cells
Source: PubMed Central journal article supplement (PMC5181778; doi:10.1128/mbio.02021-16), 2016-12-20
Supplement: mbo006163110st2.pdf [file mbo006163110st2.pdf]

**Table SII.** Summary of monoclonal antibody panel

| <b>Patient ID</b> | <b>Number V<sub>H</sub> Sequences</b> | <b>IgG</b> | <b>mAbs*<br/>IgA<sup>#</sup></b> | <b>IgM<sup>#</sup></b> | <b>Total</b> |
|-------------------|---------------------------------------|------------|----------------------------------|------------------------|--------------|
| <b>AT11</b>       | 49                                    | 17         | 5                                | 4                      | 26           |
| <b>AT13</b>       | 37                                    | 20         | 1                                | 0                      | 21           |
| <b>CF21</b>       | 35                                    | 10         | 12                               | 0                      | 22           |
| <b>CF29</b>       | 34                                    | 17         | 7                                | 0                      | 24           |
| <b>CF30</b>       | 69                                    | 16         | 5                                | 4                      | 25           |
| <b>CF31</b>       | 32                                    | 19         | 0                                | 1                      | 20           |
|                   | 256                                   | 99         | 30                               | 9                      | 138          |

\*All monoclonal antibodies were cloned into a human IgG1 backbone.

# IgA and IgM secreting cells were generated from clonal expansions.
