# Supplementary material for: Single-Cell Analysis of the Plasmablast Response to Vibrio cholerae Demonstrates Expansion of Cross-Reactive Memory B Cells
Source: PubMed Central journal article supplement (PMC5181778; doi:10.1128/mbio.02021-16), 2016-12-20
Supplement: mbo006163110st3.pdf [file mbo006163110st3.pdf]

**Table SIII.** Summary of mAb specificity

| <b>Patient</b> | <b>Cholera<br/>Toxin</b> | <b>LPS</b> | <b>Undetermined</b> |
|----------------|--------------------------|------------|---------------------|
| <b>AT11</b>    | 9                        | 1          | 16                  |
| <b>AT13</b>    | 14                       | 0          | 7                   |
| <b>CF21</b>    | 6                        | 11         | 7                   |
| <b>CF29</b>    | 5                        | 12         | 7                   |
| <b>CF30</b>    | 3                        | 0          | 22                  |
| <b>CF31</b>    | 12                       | 0          | 6                   |
| <b>Total</b>   | 49                       | 24         | 65                  |
