# Supplementary material for: Single-Cell Analysis of the Plasmablast Response to Vibrio cholerae Demonstrates Expansion of Cross-Reactive Memory B Cells
Source: PubMed Central journal article supplement (PMC5181778; doi:10.1128/mbio.02021-16), 2016-12-20
Supplement: mbo006163110st4.pdf [file mbo006163110st4.pdf]

**Table SIV: Summary of monoclonal antibody characteristics**

| Patient | Ab    | Specificity<br>(ELISA/Array) | Clonal<br>expansion<br>per patient | Original<br>Ig isotype* |                | Rearrangement |      |             |       |      |           |    |
|---------|-------|------------------------------|------------------------------------|-------------------------|----------------|---------------|------|-------------|-------|------|-----------|----|
|         |       |                              |                                    | Heavy<br>chain          | Light<br>chain | Heavy Chain   |      | Light Chain |       |      |           |    |
|         |       |                              |                                    |                         |                | V             | J    | Mutations   | V     | J    | Mutations |    |
| AT11    | 1.C04 | CtxA/Holotoxin               |                                    | IgG1                    | Igκ            | 3-21          | 3    | 16          | 4-1   | 1    | 13        |    |
|         | 1.B03 | CtxB                         | 1                                  | IgG1                    | Igκ            | 5-51          | 5    | 8           | 1-12  | 4    | 9         |    |
|         | 1.C07 | CtxB                         | 1                                  | IgG1                    | Igκ            | 5-51          | 5    | 10          | 1-12  | 4    | 13        |    |
|         | 1.A01 | CtxB                         | 4                                  | IgG2                    | Igλ            | 3-23          | 6    | 48          | 3-21  | 3    | 16        |    |
|         | 1.C06 | CtxB                         | 4                                  | IgG1                    | Igλ            | 3-23          | 6    | 20          | 3-21  | 2    | 19        |    |
|         | 1.B02 | CtxB                         |                                    | IgG1                    | Igκ            | 4-39          | 5    | 23          | 1D-33 | 4    | 13        |    |
|         | 1.C01 | CtxB                         |                                    | IgG1                    | Igλ            | 3-23          | 4    | 30          | 1-40  | 2    | 8         |    |
|         | 1.C03 | CtxB                         |                                    | IgG1                    | Igκ            | 5-51          | 5    | 11          | 1-16  | 4    | 24        |    |
|         | 1.D03 | CtxB                         |                                    | IgG1                    | Igκ            | 4-61          | 4    | 34          | 1-39  | 2    | 22        |    |
|         | 1.B12 | FlaA†                        | 3                                  | IgM                     | Igλ            | 4-39          | 5    | 11          | 1-40  | 2    | 5         |    |
|         | 1.A04 | LPS/OSP                      | 6                                  | IgM                     | Igλ            | 3-64          | 4    | 16          | 2-14  | 1    | 15        |    |
|         | 1.D11 | LPS/OSP                      | 6                                  | IgM                     | Igλ            | 3-64          | 4    | 10          | 2-18  | 1    | 6         |    |
|         | 1.C12 | PPK†                         |                                    | IgG1                    | Igλ            | 7-4           | 5    | 28          | 2-8   | 2    | 19        |    |
|         | 1.A05 | Sialidase                    |                                    | IgA1                    | Igλ            | 3-30          | 6    | 27          | 3-25  | 2    | 14        |    |
|         | 1.B04 | Sialidase                    |                                    | IgG1                    | Igκ            | 3-30          | 4    | 12          | 1-16  | 5    | 7         |    |
|         | 1.B06 | Sialidase                    |                                    | IgG1                    | Igκ            | 3-30          | 5    | 7           | 1-39  | 4    | 4         |    |
|         | 1.D06 | Sialidase                    |                                    | IgG1                    | Igλ            | 3-21          | 4    | 21          | 4-60  | 2    | 17        |    |
|         | 1.D07 | TagA†                        |                                    | IgG2                    | Igλ            | 4-59          | 5    | 14          | 1-40  | 2    | 9         |    |
|         | 1.A02 | Undetermined                 | 2                                  | IgA1                    | Igκ            | 5-51          | 5    | 36          | 4-1   | 5    | 31        |    |
|         | 1.A06 | Undetermined                 | 2                                  | IgA1                    | Igκ            | 5-51          | 4    | 24          | 4-1   | 5    | 25        |    |
|         | 1.D01 | Undetermined                 | 3                                  | IgM                     | Igλ            | 4-39          | 5    | 24          | 1-40  | 2    | 10        |    |
|         | 1.A11 | Undetermined                 | 5                                  | IgA1                    | Igκ            | 1-18          | 4    | 17          | 1-39  | 5    | 12        |    |
|         | 1.B01 | Undetermined                 | 5                                  | IgA1                    | Igκ            | 1-18          | 4    | 13          | 1-39  | 5    | 12        |    |
|         | 1.B11 | Undetermined                 |                                    | IgG2                    | Igκ            | 3-15          | 5    | 13          | 3-20  | 1    | 9         |    |
|         | 1.C09 | Undetermined                 |                                    | IgG2                    | Igκ            | 3-23          | 4    | 19          | 1-6   | 4    | 15        |    |
|         | 1.D04 | Undetermined                 |                                    | IgG1                    | Igκ            | 3-21          | 4    | 19          | 3-20  | 5    | 10        |    |
|         | AT13  | 1.B05                        | CtxA/Holotoxin                     | 1                       | IgG1           | Igκ           | 3-21 | 4           | 24    | 3-20 | 2         | 19 |
|         |       | 1.B12                        | CtxA/Holotoxin                     | 1                       | IgG1           | Igκ           | 3-21 | 4           | 22    | 3-20 | 2         | 21 |
|         |       | 1.C02                        | CtxA/Holotoxin                     | 1                       | IgG1           | Igκ           | 3-21 | 4           | 28    | 3-20 | 2         | 17 |
|         |       | 2.A05                        | CtxA/Holotoxin                     | 1                       | IgG1           | Igκ           | 3-21 | 4           | 30    | 3-20 | 2         | 22 |
| 2.B02   |       | CtxA/Holotoxin               | 1                                  | IgG1                    | Igκ            | 3-21          | 4    | 34          | 3-20  | 2    | 23        |    |
| 2.B11   |       | CtxB                         | 2                                  | IgA2                    | Igλ            | 3-11          | 4    | 30          | 1-40  | 3    | 16        |    |
| 2.C04   |       | CtxB                         | 2                                  | IgG1                    | Igλ            | 3-11          | 4    | 31          | 1-40  | 3    | 20        |    |
| 2.C10   |       | CtxB                         | 3                                  | IgG1                    | Igλ            | 3-15          | 6    | 28          | 1-40  | 1    | 27        |    |
| 1.C04   |       | CtxB                         | 4                                  | IgG1                    | Igλ            | 3-11          | 4    | 31          | 1-40  | 3    | 18        |    |
| 1.C12   |       | CtxB                         | 4                                  | IgG1                    | Igλ            | 3-11          | 4    | 31          | 1-40  | 3    | 13        |    |
| 1.A07   |       | CtxB                         |                                    | IgG1                    | Igκ            | 5-51          | 4    | 18          | 3-20  | 2    | 16        |    |
| 1.B04   |       | CtxB                         |                                    | IgG2                    | Igλ            | 7-4           | 1    | 24          | 1-40  | 3    | 23        |    |
| 2.C05   |       | CtxB                         |                                    | IgG1                    | Igλ            | 4-39          | 5    | 28          | 2-23  | 1    | 15        |    |
| 2.D05   |       | CtxB                         |                                    | IgG1                    | Igλ            | 3-11          | 3    | 8           | 1-44  | 2    | 5         |    |
| 2.B05   |       | Sialidase                    |                                    | IgG1                    | Igκ            | 3-9           | 6    | 12          | 3-11  | 2    | 9         |    |
| 1.C01   |       | Undetermined                 |                                    | IgG2                    | Igλ            | 4-28          | 5    | 42          | 1-51  | 3    | 28        |    |
| 1.D06   |       | Undetermined                 |                                    | IgG1                    | Igλ            | 7-4           | 4    | 21          | 7-43  | 3    | 25        |    |
| 2.A08   |       | Undetermined                 |                                    | IgG2                    | Igκ            | 3-53          | 6    | 33          | 1-39  | 1    | 25        |    |
| 2.B06   |       | Undetermined                 |                                    | IgG1                    | Igλ            | 4-59          | 4    | 26          | 3-21  | 3    | 13        |    |
| 2.C07   |       | Undetermined                 |                                    | IgG1                    | Igλ            | 4-39          | 5    | 27          | 2-8   | 3    | 17        |    |
| 2.D01   |       | Undetermined                 |                                    | IgG1                    | Igκ            | 3-21          | 3    | 21          | 1-39  | 4    | 19        |    |
| CF21    |       | 2.E01                        | CtxA/Holotoxin                     | 4                       | IgA1           | Igκ           | 3-21 | 3           | 16    | 4-1  | 1         | 9  |
|         |       | 1.G01                        | CtxA/Holotoxin                     | 4                       | IgG1           | Igκ           | 3-21 | 3           | 23    | 4-1  | 1         | 17 |
|         | 1.D03 | CtxA/Holotoxin               |                                    | IgG1                    | Igκ            | 4-31          | 4    | 27          | 2-30  | 1    | 10        |    |
|         | 1.B02 | CtxB                         |                                    | IgG1                    | Igκ            | 1-2           | 5    | 24          | 1-39  | 5    | 29        |    |
|         | 2.B01 | CtxB                         |                                    | IgG1                    | Igκ            | 4-59          | 4    | 28          | 1-39  | 3    | 19        |    |
|         | 2.C02 | CtxB                         |                                    | IgG1                    | Igλ            | 3-30          | 4    | 32          | 7-46  | 2    | 19        |    |

|      |       |                |   |      |     |      |   |    |       |   |    |
|------|-------|----------------|---|------|-----|------|---|----|-------|---|----|
|      | 1.A02 | LPS/OSP        | 1 | IgA2 | Igκ | 3-23 | 5 | 35 | 2-30  | 4 | 12 |
|      | 1.A03 | LPS/OSP        | 1 | IgA2 | Igκ | 3-23 | 5 | 45 | 2-30  | 4 | 30 |
|      | 1.A04 | LPS/OSP        | 1 | IgA2 | Igκ | 3-23 | 5 | 36 | 2-30  | 4 | 11 |
|      | 2.F01 | LPS/OSP        | 1 | IgA2 | Igκ | 3-23 | 5 | 39 | 2-30  | 4 | 18 |
|      | 1.B04 | LPS/OSP        | 2 | IgA1 | Igκ | 3-73 | 5 | 21 | 1-5   | 3 | 20 |
|      | 1.C01 | LPS/OSP        | 2 | IgA2 | Igκ | 3-73 | 5 | 20 | 1-5   | 3 | 15 |
|      | 1.D04 | LPS/OSP        | 2 | IgA2 | Igκ | 3-73 | 5 | 20 | 1-5   | 3 | 15 |
|      | 1.F01 | LPS/OSP        | 2 | IgA1 | Igκ | 3-73 | 5 | 27 | 1-5   | 3 | 20 |
|      | 1.D01 | LPS/OSP        | 3 | IgA1 | Igλ | 3-15 | 4 | 20 | 1-40  | 1 | 17 |
|      | 2.G01 | LPS/OSP        | 3 | IgG1 | Igλ | 3-15 | 4 | 23 | 1-40  | 1 | 13 |
|      | 1.C03 | LPS/OSP        |   | IgG2 | Igκ | 3-53 | 4 | 30 | 3-11  | 2 | 35 |
|      | 1.B01 | Undetermined   | 1 | IgA2 | Igκ | 3-23 | 5 | 40 | 2-30  | 4 | 20 |
|      | 1.F02 | Undetermined   | 1 | IgA2 | Igκ | 3-23 | 5 | 36 | 2-30  | 4 | 15 |
|      | 1.E05 | Undetermined   |   | IgG2 | Igκ | 6-1  | 4 | 25 | 1-39  | 2 | 13 |
|      | 1.A01 | Undetermined   |   | IgG1 | Igκ | 1-69 | 6 | 22 | 4-1   | 1 | 12 |
|      | 2.D01 | Undetermined   |   | IgG1 | Igκ | 3-21 | 4 | 16 | 4-1   | 1 | 19 |
| CF29 | 1.E03 | CtxB           | 3 | IgG1 | Igκ | 3-7  | 5 | 25 | 1-39  | 1 | 33 |
|      | 1.E05 | CtxB           | 3 | IgG1 | Igκ | 3-7  | 5 | 15 | 1-39  | 1 | 31 |
|      | 1.A05 | CtxB           | 3 | IgG1 | Igκ | 3-7  | 5 | 21 | 1-39  | 1 | 32 |
|      | 1.A04 | CtxB           |   | IgG1 | Igκ | 3-23 | 3 | 25 | 1-5   | 1 | 20 |
|      | 1.C01 | CtxB           |   | IgG1 | Igκ | 1-18 | 5 | 32 | 1-39  | 1 | 16 |
|      | 1.A06 | LPS/OSP        | 1 | IgA2 | Igκ | 3-7  | 4 | 4  | 4-1   | 4 | 12 |
|      | 1.B02 | LPS/OSP        | 1 | IgA2 | Igκ | 3-7  | 4 | 14 | 4-1   | 4 | 11 |
|      | 1.B05 | LPS/OSP        | 1 | IgA1 | Igκ | 3-7  | 4 | 10 | 4-1   | 4 | 13 |
|      | 1.C02 | LPS/OSP        | 1 | IgG2 | Igκ | 3-7  | 4 | 4  | 4-1   | 4 | 14 |
|      | 1.G01 | LPS/OSP        | 1 | IgA1 | Igκ | 3-7  | 4 | 8  | 4-1   | 4 | 13 |
|      | 1.G02 | LPS/OSP        | 1 | IgA1 | Igκ | 3-7  | 5 | 17 | 4-1   | 4 | 19 |
|      | 1.E06 | LPS/OSP        | 2 | IgG1 | Igκ | 3-7  | 4 | 10 | 2-28  | 3 | 3  |
|      | 1.A01 | LPS/OSP        | 2 | IgA1 | Igκ | 3-7  | 5 | 14 | 2-28  | 3 | 7  |
|      | 1.A02 | LPS/OSP        | 2 | IgG1 | Igκ | 3-7  | 4 | 25 | 2-28  | 3 | 4  |
|      | 1.C04 | LPS/OSP        | 2 | IgG1 | Igκ | 3-7  | 4 | 20 | 2-28  | 3 | 9  |
|      | 1.G04 | LPS/OSP        | 2 | IgA1 | Igκ | 3-7  | 4 | 13 | 2-28  | 3 | 1  |
|      | 1.G05 | LPS/OSP        | 2 | IgG1 | Igκ | 3-7  | 4 | 15 | 2-28  | 3 | 8  |
|      | 1.C06 | Sialidase      |   | IgG1 | Igκ | 3-23 | 4 | 17 | 1-5   | 2 | 17 |
|      | 1.B03 | Undetermined   |   | IgG1 | Igλ | 3-48 | 6 | 0  | 1-40  | 3 | 18 |
|      | 1.B06 | Undetermined   |   | IgG1 | Igλ | 3-23 | 1 | 35 | 1-51  | 3 | 16 |
|      | 1.C03 | Undetermined   |   | IgG1 | Igκ | 3-9  | 6 | 22 | 1-39  | 2 | 16 |
|      | 1.D01 | Undetermined   |   | IgG1 | Igκ | 3-48 | 3 | 21 | 1-39  | 1 | 19 |
|      | 1.F06 | Undetermined   |   | IgG1 | Igκ | 4-59 | 6 | 31 | 1-5   | 4 | 20 |
|      | 1.G03 | Undetermined   |   | IgG1 | Igκ | 3-9  | 6 | 13 | 1-39  | 2 | 19 |
| CF30 | 1.A03 | CtxA/Holotoxin |   | IgG1 | Igκ | 3-11 | 6 | 17 | 4-1   | 1 | 13 |
|      | 2.E02 | CtxB           | 3 | IgG1 | Igκ | 5-51 | 3 | 22 | 1-5   | 4 | 21 |
|      | 1.E06 | CtxB           | 3 | IgG1 | Igκ | 5-51 | 3 | 22 | 1-5   | 4 | 26 |
|      | 1.A05 | Undetermined   | 1 | IgA1 | Igλ | 5-51 | 5 | 31 | 2-14  | 2 | 28 |
|      | 1.D04 | Undetermined   | 1 | IgA1 | Igλ | 5-51 | 5 | 31 | 2-14  | 2 | 28 |
|      | 2.G02 | Undetermined   | 2 | IgA1 | Igκ | 3-30 | 4 | 16 | 4-1   | 1 | 12 |
|      | 2.E05 | Undetermined   | 4 | IgM  | Igκ | 1-2  | 4 | 22 | 1-39  | 2 | 24 |
|      | 2.B05 | Undetermined   | 4 | IgM  | Igκ | 1-2  | 4 | 25 | 1-39  | 2 | 15 |
|      | 2.A03 | Undetermined   | 5 | IgM  | Igκ | 3-15 | 5 | 39 | 3-20  | 4 | 21 |
|      | 2.G05 | Undetermined   | 5 | IgM  | Igκ | 3-15 | 5 | 19 | 3D-20 | 4 | 17 |
|      | 1.A06 | Undetermined   | 6 | IgA1 | Igκ | 3-7  | 6 | 12 | 2-30  | 3 | 5  |
|      | 2.C01 | Undetermined   | 6 | IgA1 | Igκ | 3-7  | 6 | 11 | 2-30  | 3 | 5  |
|      | 1.E02 | Undetermined   |   | IgG1 | Igκ | 4-39 | 3 | 7  | 1-5   | 2 | 8  |
|      | 1.E03 | Undetermined   |   | IgG1 | Igκ | 4-34 | 5 | 24 | 3-15  | 2 | 15 |
|      | 1.A02 | Undetermined   |   | IgG1 | Igκ | 3-21 | 2 | 12 | 1-5   | 1 | 5  |
|      | 1.C01 | Undetermined   |   | IgG1 | Igλ | 1-8  | 6 | 23 | 2-14  | 1 | 14 |
|      | 1.C03 | Undetermined   |   | IgG2 | Igκ | 7-4  | 4 | 7  | 1-39  | 1 | 11 |
|      | 1.C05 | Undetermined   |   | IgG2 | Igλ | 3-72 | 5 | 16 | 1-47  | 3 | 18 |
|      | 2.A01 | Undetermined   |   | IgG2 | Igκ | 3-7  | 2 | 12 | 4-1   | 1 | 5  |
|      | 2.A02 | Undetermined   |   | IgG1 | Igλ | 7-4  | 4 | 18 | 2-14  | 2 | 11 |

|      |       |                |   |      |     |       |   |    |       |   |    |
|------|-------|----------------|---|------|-----|-------|---|----|-------|---|----|
|      | 2.B01 | Undetermined   |   | IgG1 | Igκ | 4-59  | 3 | 23 | 3-15  | 5 | 20 |
|      | 2.B03 | Undetermined   |   | IgG1 | Igκ | 3-53  | 4 | 5  | 3-20  | 1 | 6  |
|      | 2.C02 | Undetermined   |   | IgG1 | Igλ | 4-39  | 6 | 7  | 3-1   | 1 | 3  |
|      | 2.G01 | Undetermined   |   | IgG3 | Igκ | 7-4-1 | 6 | 13 | 1-39  | 1 | 10 |
|      | 2.G03 | Undetermined   |   | IgG1 | Igλ | 4-30  | 6 | 1  | 1-44  | 3 | 1  |
| CF31 | 1.B05 | CtxA/Holotoxin |   | IgG1 | Igκ | 3-21  | 4 | 20 | 3-20  | 2 | 20 |
|      | 1.D02 | CtxA/Holotoxin |   | IgG1 | Igκ | 3-21  | 6 | 20 | 4-1   | 2 | 13 |
|      | 1.E02 | CtxB           | 2 | IgG1 | Igκ | 4-61  | 2 | 19 | 1-16  | 1 | 15 |
|      | 1.C02 | CtxB           | 2 | IgG1 | Igκ | 4-61  | 2 | 30 | 1-16  | 1 | 23 |
|      | 1.E04 | CtxB           | 3 | IgG1 | Igκ | 5-51  | 4 | 27 | 1D-12 | 2 | 20 |
|      | 1.C05 | CtxB           | 3 | IgG1 | Igκ | 5-51  | 4 | 24 | 1-12  | 2 | 18 |
|      | 1.E06 | CtxB           |   | IgG1 | Igλ | 3-30  | 6 | 24 | 3-21  | 1 | 26 |
|      | 1.B06 | CtxB           |   | IgG1 | Igλ | 3-23  | 4 | 20 | 3-21  | 3 | 16 |
|      | 1.F03 | CtxB           |   | IgG1 | Igλ | 3-30  | 6 | 19 | 3-21  | 1 | 28 |
|      | 1.F05 | CtxB           |   | IgG1 | Igλ | 3-43  | 6 | 25 | 1D-33 | 5 | 13 |
|      | 1.G01 | CtxB           |   | IgG1 | Igλ | 3-15  | 5 | 14 | 1-40  | 2 | 10 |
|      | 1.G03 | CtxB           |   | IgG1 | Igλ | 1-2   | 4 | 22 | 1-40  | 3 | 8  |
|      | 1.B04 | LPS/OSP        | 1 | IgG1 | Igκ | 3-23  | 4 | 29 | 3-20  | 4 | 14 |
|      | 1.F02 | Undetermined   | 1 | IgM  | Igκ | 3-23  | 4 | 27 | 3-20  | 4 | 16 |
|      | 1.A01 | Undetermined   |   | IgG1 | Igκ | 3-23  | 2 | 20 | 3-11  | 4 | 8  |
|      | 1.A03 | Undetermined   |   | IgG1 | Igκ | 3-23  | 4 | 23 | 1-5   | 1 | 14 |
|      | 1.A04 | Undetermined   |   | IgG1 | Igκ | 1-18  | 6 | 28 | 4-1   | 3 | 15 |
|      | 1.F04 | Undetermined   |   | IgG2 | Igλ | 4-4   | 3 | 14 | 1-44  | 3 | 13 |
|      | 1.G02 | Undetermined   |   | IgG2 | Igκ | 7-4   | 4 | 24 | 4-1   | 1 | 19 |
|      | 1.G05 | Undetermined   |   | IgG1 | Igκ | 3-33  | 4 | 24 | 1-5   | 1 | 15 |

\* All mAbs were cloned into heavy chain expression vectors containing the IgG1 constant region

† FlaA (Flagellin protein), TagA (Lipoprotein ToxR activated gene), PPK (Phosphocarrier protein kinase)
